# Supplementary material for: Arginine Methyltransferase PRMT1 Regulates p53 Activity in Breast Cancer
Source: MDPI journal article supplement (doi:10.3390/life11080789), 2021-08-05

Figure 1B top

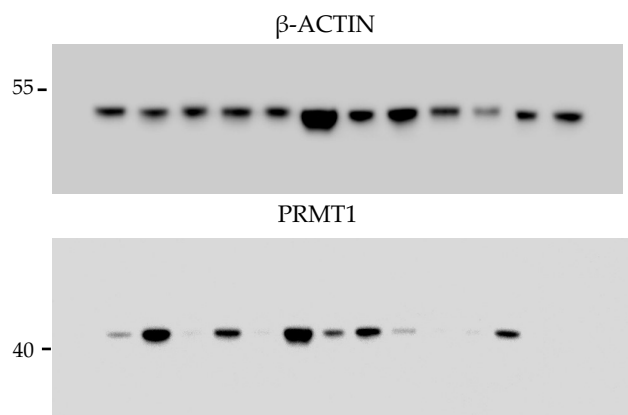

Figure 1B bottom

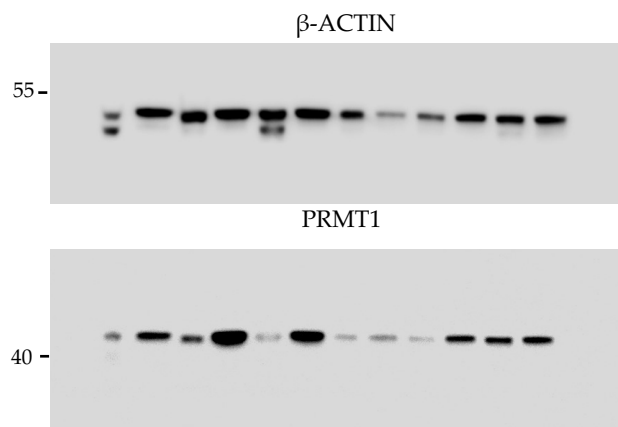

Figure 1D left

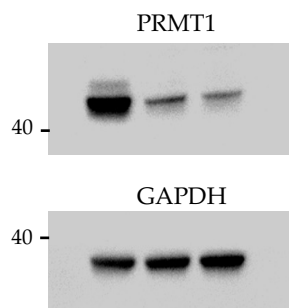

Figure 1D right

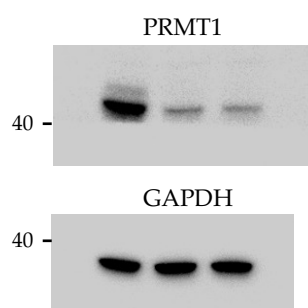

Figure 1H

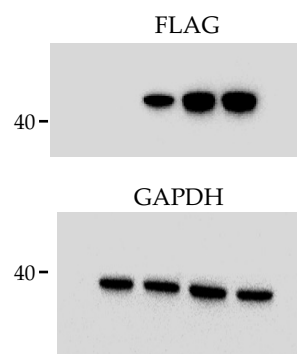

Figure 2E

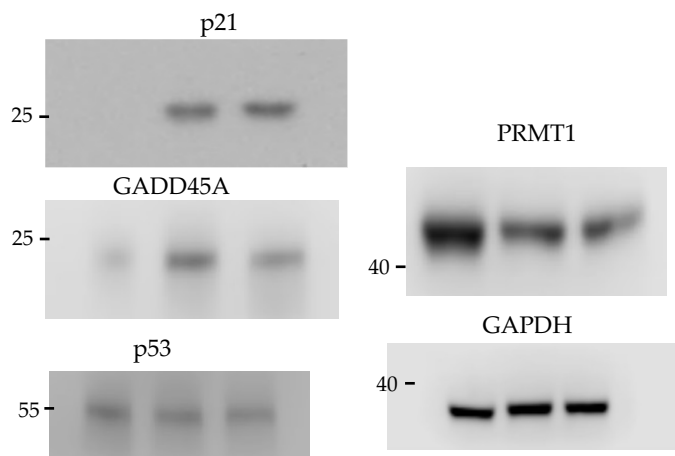

Figure 2F

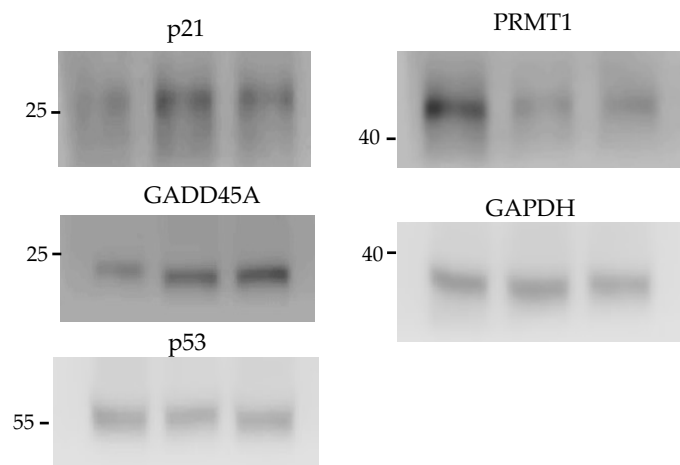

Figure 2G

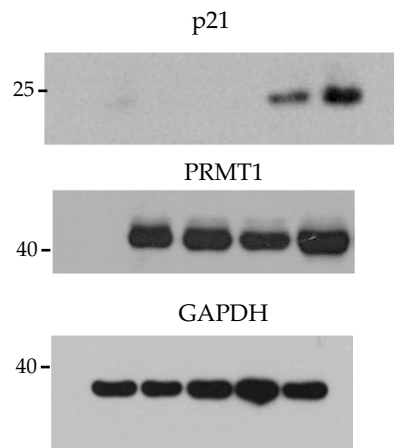

Figure 2H

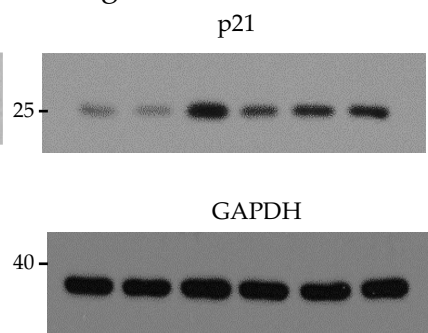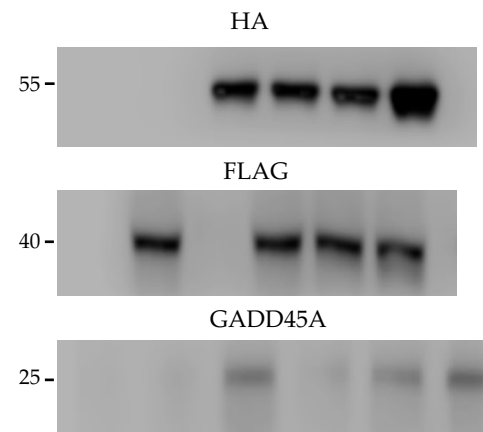

Figure 3A

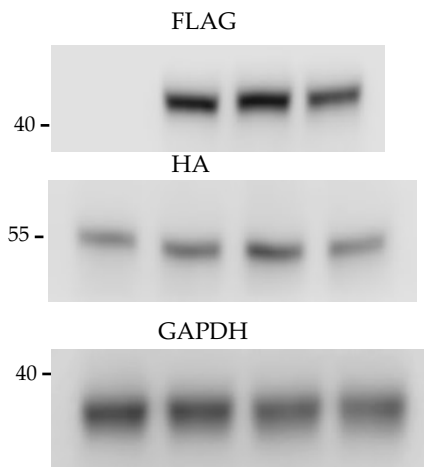

Figure 3B

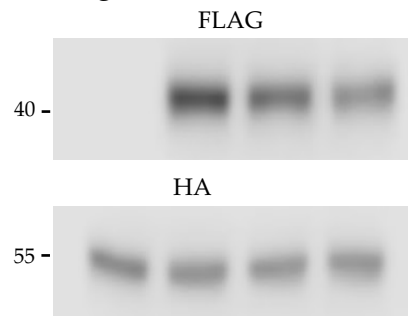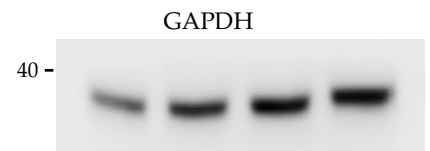

Figure 3C

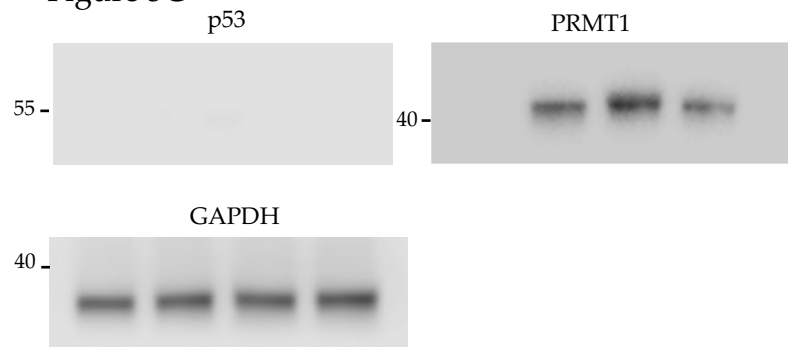

Figure 3D

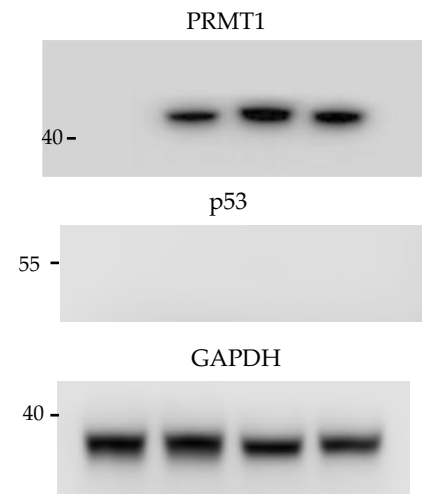

Figure 4A

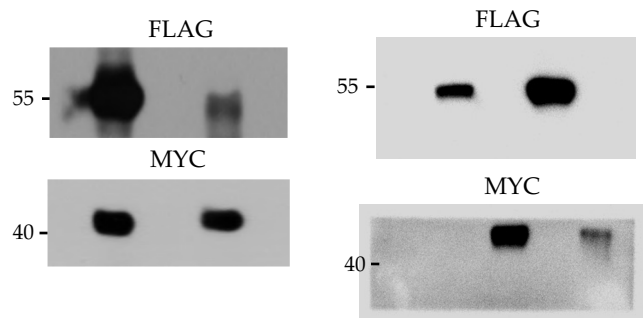

Figure 4B

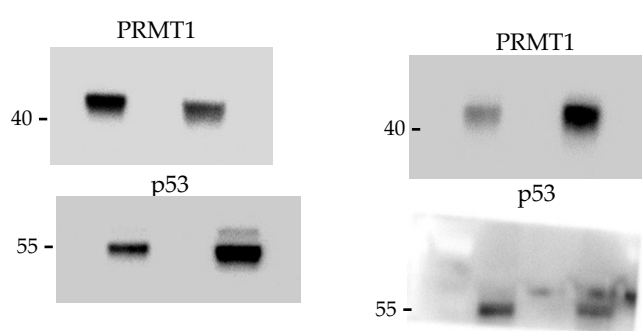

Figure 4C

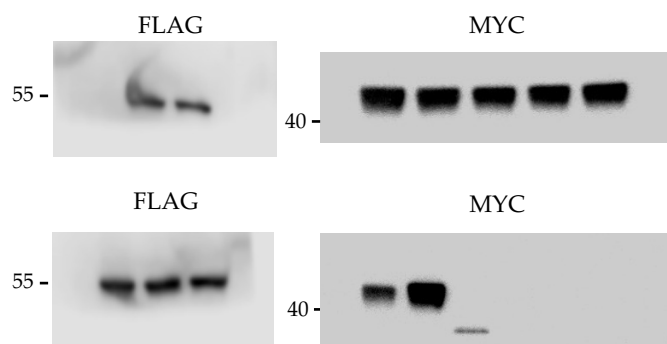

Figure 4D

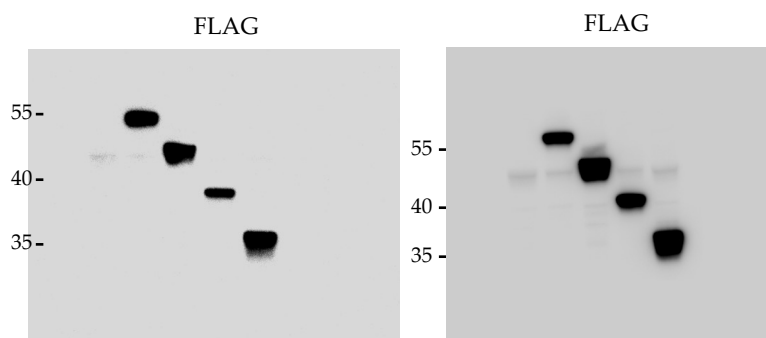

Figure 4E

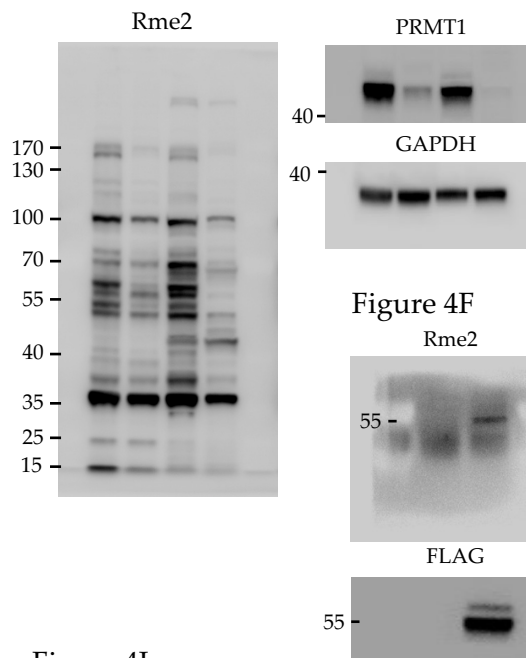

Figure 4G

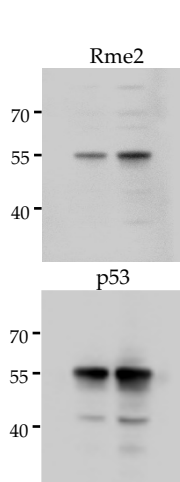

Figure 4H

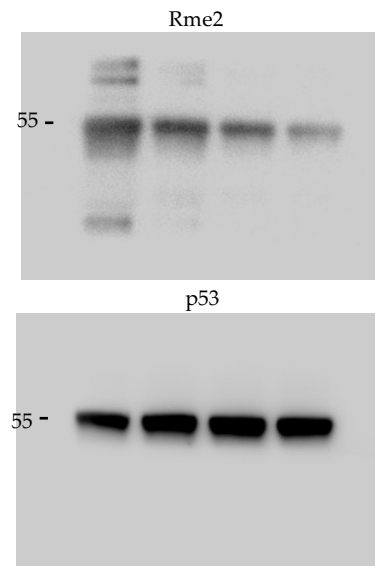

Figure 4F

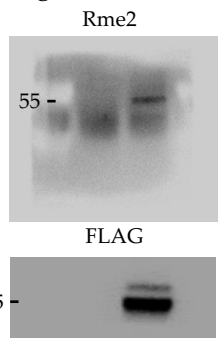

Figure 4J

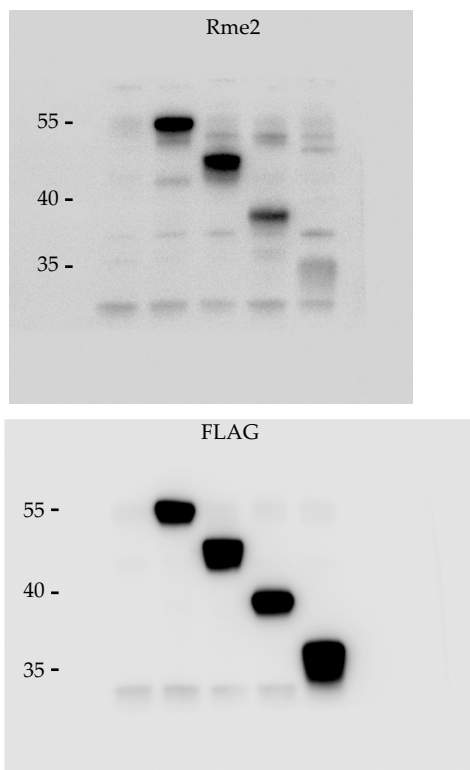

Figure 4K

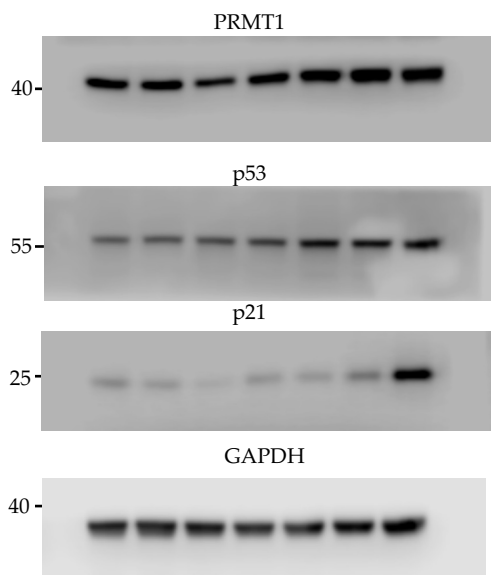

Figure 4I

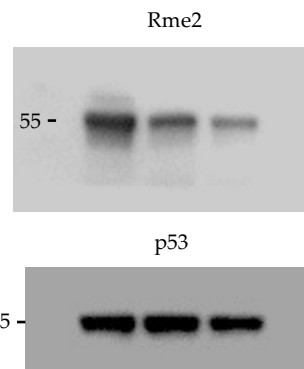

Figure 4L

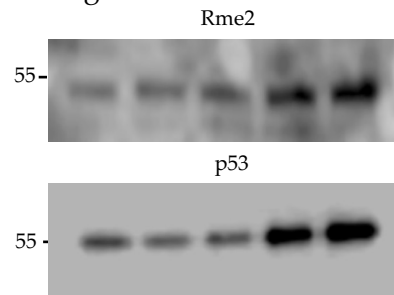

Figure 5A

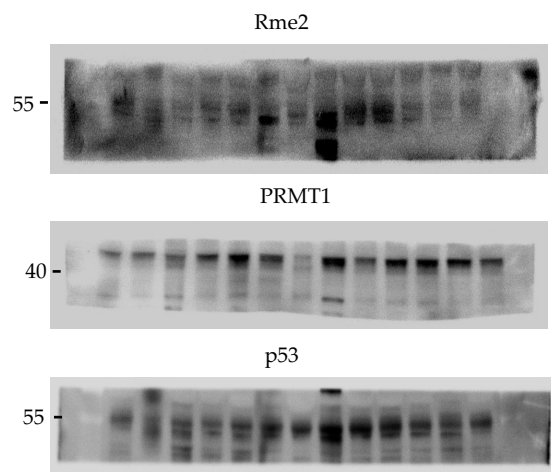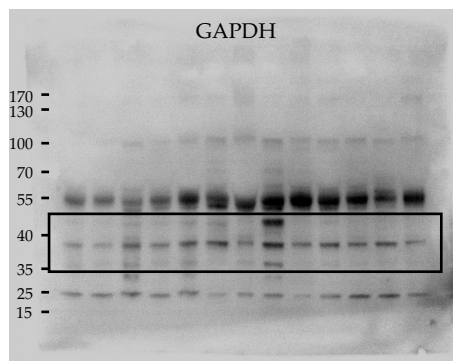

Figure 5B left

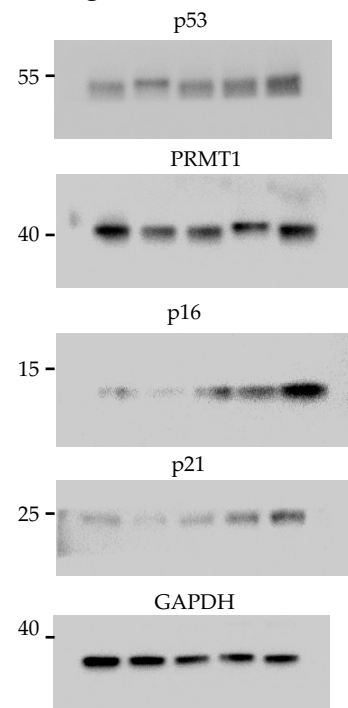

Figure 5B right

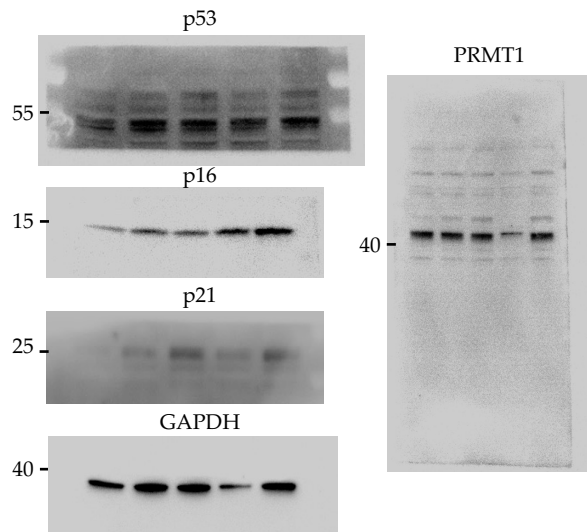

Figure 5C

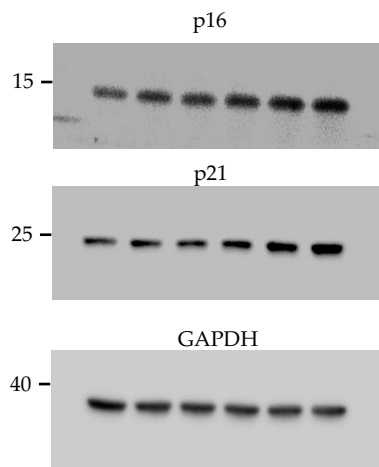

Figure 5D

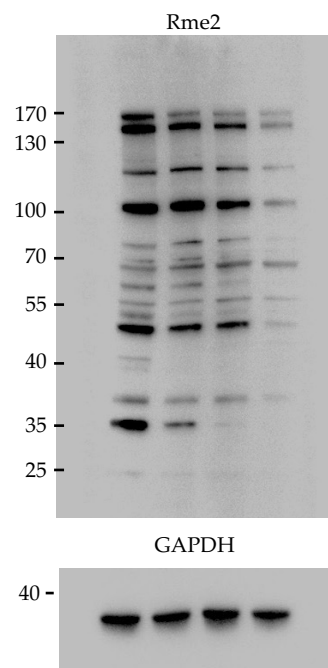

Supplement: s1 [file s1]
