# Supplementary material for: Arginine Methyltransferase PRMT1 Regulates p53 Activity in Breast Cancer
Source: MDPI journal article supplement (doi:10.3390/life11080789), 2021-08-05
Supplement: s1 [file s1]

**Table S1.** Primers used in this paper.

| <b>Primers for PRMT1(G80R)</b> |                                   |
|--------------------------------|-----------------------------------|
|                                | Sequence (5'-3')                  |
| PRMT1(G80R)-F                  | CTGGACGTCGGCTCGCGCACCGGCATCCTCTGC |
| PRMT1(G80R)-R                  | GCAGAGGATGCCGGTGCGCGAGCCGACGTCCAG |

  

| <b>RT-PCR Primers</b> |                          |
|-----------------------|--------------------------|
|                       | Sequence (5'-3')         |
| p21-F                 | GGCAGACCAGCATGACAGATT    |
| p21-R                 | GCGGATTAGGGCTTCCTCTT     |
| p53-F                 | CCCAAGCAATGGATGATTGTA    |
| p53-R                 | GGCATTCTGGGAGCTTCATCT    |
| GADD45A-F             | CTGGAGGAAGTGCTCAGCAAAG   |
| GADD45A-R             | AGAGCCACATCTCTGTCTCGTCGT |
| PUMA-F                | CGGAGACAAGAGGAGCAG       |
| PUMA-R                | GGAGTCCCATGATGAGATTG     |
| BID-F                 | CCTTGCTCCGTGATGTCTTTC    |
| BID-R                 | GTAGGTGCGTAGGTTCTGGT     |
| PRMT1-F               | TACACGCACTGGAAGCAGA      |
| PRMT1-R               | GGTTGTTCTTGGCGTTGG       |
| GAPDH-F               | GGTCGTATTGGGCGCCTGGTCACC |
| GAPDH-R               | CACACCCATGACGAACATGGGGGC |

  

| <b>shRNA sequences</b> |                                                            |
|------------------------|------------------------------------------------------------|
|                        | Sequence (5'-3')                                           |
| shPRMT1-1-F            | CCGGCTTACCGCAACTCCATGTTTCCTCGAGGAAACATGGAGTTGCGGTAAGTTTTTG |
| shPRMT1-1-R            | AATTCAAAACTTACCGCAACTCCATGTTTCCTCGAGGAAACATGGAGTTGCGGTAAG  |
| shPRMT1-2-F            | CCGGTTGACTCCTACGCACACTTTGCTCGAGCAAAGTGTGCGTAGGAGTCAATTTTTG |
| shPRMT1-2-R            | AATTCAAAAATTGACTCCTACGCACACTTTGCTCGAGCAAAGTGTGCGTAGGAGTCAA |
