# Supplementary material for: Arginine Methyltransferase PRMT1 Regulates p53 Activity in Breast Cancer
Source: MDPI journal article supplement (doi:10.3390/life11080789), 2021-08-05
Supplement: s1 [file s1]

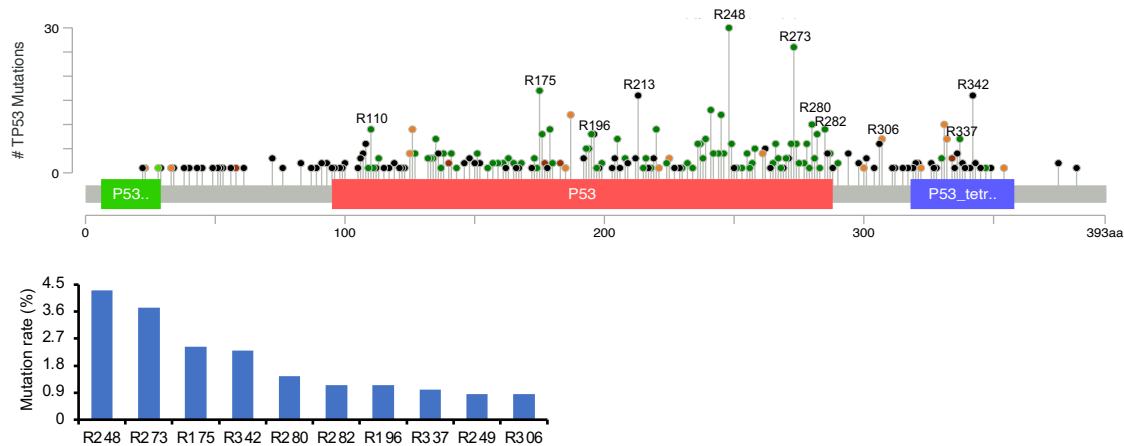

**Figure S1.** Mutation analysis of p53 gene in breast cancer patients. 1756 breast cancer patients/1989 samples were analyzed using cBioPortal. 696 mutations were found (top), and the mutation rates of arginine residues were shown (bottom).
